# Supplementary material
Source: Springer Nature journal article supplement (https://www.springermedizin.de/resource/supplementary/12903_2012_248_MOESM3_ESM.pdf/9516464)
Supplement: MOESM3 [file 9516464]

**Adverse event observed on MDC or reported by parent**

**Was the event considered any of the following:**

- Fatal?
- Life-threatening?
- To require inpatient hospitalisation/prolong existing hospitalisation?
- To result in persistent or significant incapacity
- A congenital anomaly/birth defect

NO

**Manage according to current clinical protocol**

YES

**Investigator to assess causality and fax completed SAE form to trial management team within 24 hrs**

**Is the event considered definitely, probably or possibly related to the intervention?**

NO

**Unrelated SAE: to be included in annual safety report**

YES

**Is the event considered to be a known adverse reaction/undesirable effect from the SmPC/manufacture's information**

YES

**SAR: to be included in annual safety report**

NO

**SUSAR: MHRA and REC to be notified:**

- in 7 days if fatal or life-threatening
- in 15 days if non life threatening
